# Supplementary material for: Reactive oxygen species-responsive nanoparticles based on a thioketal-containing poly(β-amino ester) for combining photothermal/photodynamic therapy and chemotherapy
Source: Royal Society of Chemistry journal article supplement (doi:10.1039/c9py00575g), 2019-01-01
Supplement: c9py00575g1.pdf [file c9py00575g1.pdf]

## Supplementary Material for

### Reactive oxygen species-responsive nanoparticles based on thioketal-containing poly( $\beta$ -amino ester) for combining photothermal/photodynamic therapy and chemotherapy

Bowei Chen,<sup>a</sup> Yajun Zhang,<sup>a</sup> Ruixue Ran,<sup>a</sup> Bin Wang,<sup>a</sup> Furong Qin,<sup>a</sup> Tao Zhang,<sup>a</sup> Guoyun Wan,<sup>a,b</sup> Hongli Chen<sup>\*b</sup> and Yinsong Wang<sup>\*a</sup>

<sup>a</sup> *School of Pharmacy, Tianjin Key Laboratory on Technologies Enabling Development of Clinical Therapeutics and Diagnostics (Theranostics), Tianjin Medical University, Tianjin 300070, China*

<sup>b</sup> *The Key Laboratory of Biomedical Material, School of Life Science and Technology, Xinxiang Medical University, Xinxiang 453003, China*

\* Corresponding author at:

School of Pharmacy, Tianjin Medical University, No. 22 Qixiangtai Road, Heping District, Tianjin 300070, China.

*E-mail address:* wangyinsong@tmu.edu.cn (Y. Wang).

Corresponding Authors

\* E-mail: [wangyinsong@tmu.edu.cn](mailto:wangyinsong@tmu.edu.cn) (Yinsong Wang)

\* E-mail: [chenhlhl@126.com](mailto:chenhlhl@126.com) (Hongli Chen).

ORCID

Yinsong Wang: 0000-0002-1403-2113

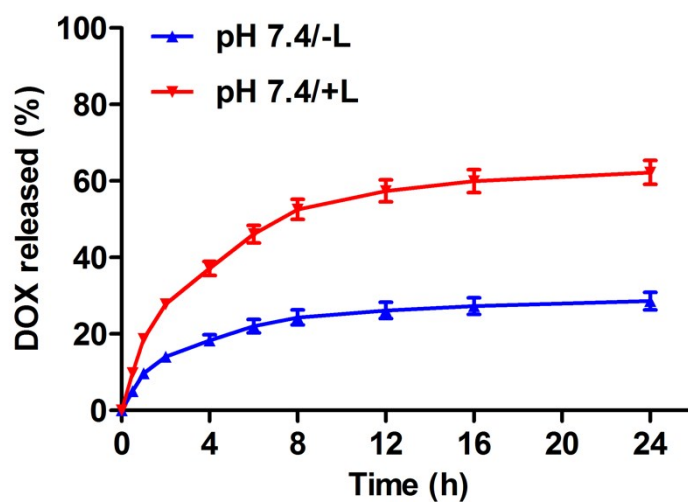

**Fig. S1.** *In vitro* release profiles of DOX from PPID nanoparticles with and without light irradiation. The laser irradiation was carried out at 808 nm at a power density of 2 W/cm<sup>2</sup> for 10 min.

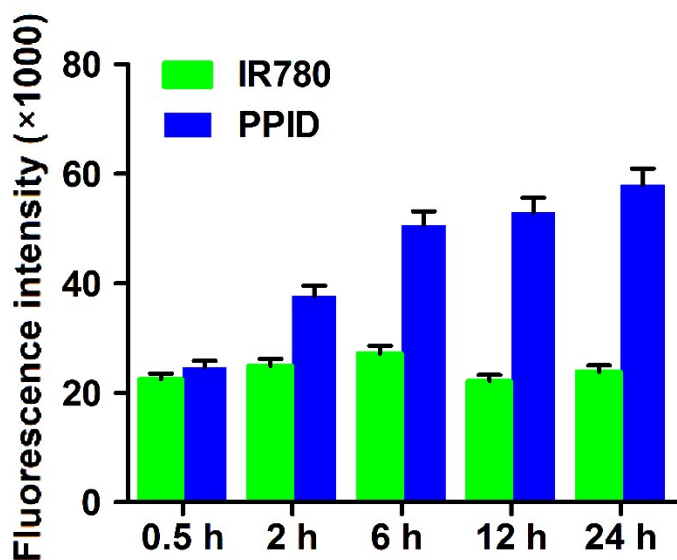

**Fig. S2.** Cellular uptakes of free IR780 and PPID nanoparticles analysed using the flow cytometry at different time points. The concentrations of IR780 were 4 µg/mL.
